# Supplementary material for: Using patient-reported outcome measures during the management of patients with end-stage kidney disease requiring treatment with haemodialysis (PROM-HD): a qualitative study
Source: HighWire-hosted journal article supplement (doi:10.1136/bmjopen-2021-052629), 2021-08-01
Supplement: bmjopen-2021-052629supp004_data_supplement.pdf [file bmjopen-2021-052629supp004_data_supplement.pdf]

Suppl Table 2 Healthcare Professional Participants: Saturation table and interview characteristics

|                                      | Value                          |
|--------------------------------------|--------------------------------|
| <b>HCP Interviews</b>                |                                |
| Number invited/Number participating  | 19/17                          |
| Reasons for non-participation        | Competing clinical commitments |
| Duration of patient interviews (min) | Range 29-63<br>Mean 48 mins    |
| <b>Patient Saturation Data</b>       |                                |
| No of codes generated                | 134                            |
| Point of data saturation             | 16 <sup>th</sup> Interview     |
| Note n=17                            |                                |

| Participants n=17                   |                                           | 1 | 2 | 3 | 4 | 5 | 6 | 7 | 8 | 9 | 10 | 11 | 12 | 13 | 14 | 15 | 16 | 17 |
|-------------------------------------|-------------------------------------------|---|---|---|---|---|---|---|---|---|----|----|----|----|----|----|----|----|
| <b>1 Innovation Characteristics</b> |                                           |   |   |   |   |   |   |   |   |   |    |    |    |    |    |    |    |    |
| 1A Innovation Source                |                                           |   |   |   |   | x |   |   |   |   |    |    |    |    |    | x  |    |    |
| 1B Evidence strength and quality    |                                           | x |   |   |   | x |   |   |   | x |    | x  |    | x  | x  | x  | x  | x  |
| 1C Relative Advantage               |                                           | x | x | x | x | x | x |   | x | x | x  | x  | x  | x  | x  | x  | x  | x  |
|                                     | How PROMs might work to deliver advantage |   | x |   | x | x | x | x | x | x |    | x  | x  |    | x  |    | x  | x  |
| 1D Adaptability                     |                                           | x |   |   |   | x |   |   |   |   |    |    |    |    |    |    |    | x  |
|                                     | Use within research                       |   |   |   | x | x |   |   |   |   |    |    | x  |    | x  | x  | x  |    |
| 1E Trialability                     |                                           |   |   |   |   |   |   |   |   |   |    |    |    |    |    |    |    | x  |
| 1F Complexity                       |                                           | x |   |   |   | x | x |   | x |   | x  |    |    |    |    |    |    | x  |
| 1G Design and Packaging             |                                           | x | x | x | x | x | x | x | x | x | x  | x  | x  | x  | x  | x  | x  | x  |
|                                     | Frequency                                 | x | x | x | x | x | x | x | x | x | x  | x  | x  | x  | x  | x  |    | x  |
|                                     | Length                                    |   |   | x | x | x |   |   | x |   | x  | x  | x  | x  | x  |    | x  |    |
|                                     | Mode                                      | x | x |   | x | x |   |   | x | x | x  | x  | x  | x  |    | x  | x  |    |

Suppl Table 2 Healthcare Professional Participants: Saturation table and interview characteristics

| Participants n=17                   |                               | 1 | 2 | 3 | 4 | 5 | 6 | 7 | 8 | 9 | 10 | 11 | 12 | 13 | 14 | 15 | 16 | 17 |
|-------------------------------------|-------------------------------|---|---|---|---|---|---|---|---|---|----|----|----|----|----|----|----|----|
|                                     | Setting                       |   | x | x | x | x |   | x | x | x | x  |    |    | x  |    |    | x  | x  |
|                                     | Timing                        |   | x | x | x |   | x |   | x | x | x  | x  | x  | x  | x  |    | x  |    |
|                                     | Self-completion               |   | x | x | x | x | x | x |   |   |    | x  | x  | x  | x  |    | x  |    |
|                                     | Outcomes that matter          | x | x | x | x |   | x |   | x | x | x  |    | x  |    |    | x  |    | x  |
|                                     | Safety Alerts                 |   |   | x |   |   | x |   |   |   | x  |    |    | x  | x  | x  | x  |    |
|                                     | Sensitivity                   |   |   |   |   |   | x |   | x |   | x  | x  |    |    |    |    | x  | x  |
|                                     | Computer Adaptive Technology  |   |   |   |   | x |   | x | x | x | x  | x  | x  | x  |    | x  | x  |    |
|                                     | Review and Feedback           | x | x | x | x | x | x | x |   |   |    | x  | x  | x  | x  | x  | x  | x  |
| IH Cost                             |                               |   |   |   |   |   |   |   |   |   |    |    |    | x  |    | x  |    |    |
| <b>2 Outer Setting</b>              |                               |   |   |   |   |   |   |   |   |   |    |    |    |    |    |    |    |    |
| 2A Needs and resources              |                               |   |   |   |   | x | x | x |   | x | x  | x  | x  | x  |    | x  |    |    |
|                                     | Barriers                      |   | x |   | x | x | x | x | x | x | x  | x  | x  | x  | x  | x  | x  | x  |
|                                     | Facilitators                  |   |   | x | x | x |   |   | x |   | x  | x  | x  |    |    |    | x  |    |
| 2B Cosmopolitanism                  |                               |   |   | x | x |   | x | x |   |   |    |    | x  |    |    |    |    |    |
| 2C Peer Pressure                    |                               |   |   |   |   |   |   |   |   |   |    |    |    |    |    |    |    |    |
| 2D External policies and incentives |                               |   |   | x |   | x | x | x | x |   |    |    |    | x  | x  |    | x  | x  |
| <b>3 Inner Setting</b>              |                               |   |   |   |   |   |   |   |   |   |    |    |    |    |    |    |    |    |
| 3A Structural Characteristics       |                               | x | x | x | x |   | x | x |   |   |    | x  | x  | x  | x  |    |    |    |
| 3B Networks and Communications      |                               | x |   | x | x | x |   | x | x | x | x  | x  | x  |    | x  | x  |    | x  |
| 3C Culture                          |                               | x | x | x |   | x | x | x |   |   | x  | x  | x  |    |    | x  | x  | x  |
| 3D Implementation Climate           | Tension for change            | x | x | x |   | x |   |   | x | x | x  |    |    | x  |    |    |    |    |
|                                     | Task focused approach to care |   |   |   |   |   |   | x | x |   |    | x  | x  |    | x  | x  | x  | x  |
|                                     | Compatibility                 | x |   |   |   | x | x |   | x |   | x  | x  |    |    |    |    | x  |    |
|                                     | Relative Priority             | x |   |   |   |   | x |   |   |   |    |    |    |    | x  |    |    |    |
|                                     | Organisational Incentives     |   |   |   |   |   |   |   |   |   |    |    |    |    |    |    |    |    |
|                                     | Goals and Feedback            |   | x |   |   | x |   |   |   | x |    |    |    |    |    |    |    |    |
|                                     | Learning Climate              |   | x | x |   |   |   |   |   |   |    | x  |    |    |    |    |    | x  |
| 3E Readiness for Implementation     | Leadership Engagement         |   | x |   |   |   |   |   |   |   |    | x  |    |    |    |    |    |    |

Suppl Table 2 Healthcare Professional Participants: Saturation table and interview characteristics

| Participants n=17                           |                                      | 1 | 2 | 3 | 4 | 5 | 6 | 7 | 8 | 9 | 10 | 11 | 12 | 13 | 14 | 15 | 16 | 17 |
|---------------------------------------------|--------------------------------------|---|---|---|---|---|---|---|---|---|----|----|----|----|----|----|----|----|
|                                             | Available Resources                  | x | x | x | x | x | x | x | x | x | x  | x  | x  | x  | x  | x  | x  | x  |
|                                             | Access to knowledge and info         |   | x | x | x | x |   | x | x | x | x  |    | x  |    |    |    | x  | x  |
| <b>4 Characteristics of Individuals</b>     |                                      |   |   |   |   |   |   |   |   |   |    |    |    |    |    |    |    |    |
| Knowledge and beliefs                       |                                      | x | x | x |   | x |   | x | x | x |    |    | x  |    | x  |    | x  | x  |
| Self-efficacy                               | Ability of patients to self-complete | x | x | x |   | x | x |   | x | x | x  |    | x  |    | x  | x  |    | x  |
| Individual stage of change                  | Previous experience of PROMs usage   | x | x | x | x | x | x | x | x | x | x  |    | x  | x  | x  | x  | x  |    |
| Individual identification with organisation |                                      |   | x | x |   |   |   |   |   | x | x  |    | x  |    |    |    |    |    |
| Other personal attributes                   |                                      | x | x | x | x |   | x | x |   |   |    | x  | x  | x  | x  | x  | x  |    |
| <b>5 Process</b>                            |                                      |   |   |   |   |   |   |   |   |   |    |    |    |    |    |    |    |    |
| 5A Planning                                 |                                      |   |   |   |   | x |   | x |   |   |    |    |    |    |    |    |    |    |
| 5B Engaging                                 | Opinion Leaders                      | x |   |   |   | x | x |   | x |   |    |    |    |    |    |    |    | x  |
|                                             | Formally appointed leaders           | x |   | x | x | x |   | x | x | x | x  |    | x  |    | x  |    |    | x  |
|                                             | Champions                            |   | x | x |   |   |   | x |   |   | x  |    | x  |    |    |    |    | x  |
|                                             | External Change Agents               |   |   |   |   |   |   |   |   |   |    |    | x  |    |    | x  |    | x  |
|                                             | Key Stakeholders                     |   |   |   |   | x |   |   |   |   |    |    |    |    |    |    |    | x  |
|                                             | Innovation Participants              |   |   |   |   | x |   |   |   |   |    |    |    |    |    |    |    |    |
| 5C Executing                                |                                      |   |   |   |   |   |   |   |   |   |    |    |    |    |    |    |    |    |
| 5D Reflecting and Evaluating                |                                      |   |   |   |   |   |   |   |   |   |    |    |    |    |    | x  |    |    |

|                                             |   |
|---------------------------------------------|---|
| First time data coded to this node in NVIVO | x |
| Nothing coded to this node in NVIVO         |   |
